# Supplementary material for: Green Synthesis of Silver Nanoparticles with Antibacterial Activity Using Various Medicinal Plant Extracts: Morphology and Antibacterial Efficacy
Source: PubMed Central journal article supplement (PMC8070782; doi:10.3390/nano11041005), 2021-04-14
Supplement: nanomaterials-11-01005-s001.pdf [file nanomaterials-11-01005-s001.pdf]

**SUPPLEMENTARY INFORMATION**

**Table S1.** The mean inhibition zone diameter (IZD)  $\pm$  SD of plant extracts and prepared silver nanoparticles (AgNPs) of 3 replicate plates.

|             | Bacteria type              | <i>P. aeruginosa</i> | <i>L. monocytogenes</i> | <i>E. coli</i>    | S<br>·<br>e<br>n<br>t<br>e<br>r<br>i<br>c<br>a<br>s<br>e<br>r<br>·<br>T<br>y<br>p<br>h<br>i<br>m<br>u<br>r<br>i<br>u<br>m |                                                    |
|-------------|----------------------------|----------------------|-------------------------|-------------------|---------------------------------------------------------------------------------------------------------------------------|----------------------------------------------------|
|             |                            |                      |                         |                   | IZD $\pm$ SD (mm)                                                                                                         | IZD $\pm$ SD (mm)                                  |
|             | Conc. of AgNO <sub>3</sub> | IZD $\pm$ SD (mm)    | IZD $\pm$ SD (mm)       | IZD $\pm$ SD (mm) | I<br>Z<br>D<br>$\pm$<br>S<br>D<br>(<br>m<br>m<br>)                                                                        | I<br>Z<br>D<br>$\pm$<br>S<br>D<br>(<br>m<br>m<br>) |
| CBP extract | -                          | 5.50 $\pm$ 0.00      | 5.50 $\pm$ 0.00         | 5.50 $\pm$ 0.00   | 5<br>·<br>5<br>0<br>$\pm$<br>0<br>·<br>0<br>0                                                                             | 5<br>·<br>5<br>0<br>$\pm$<br>0<br>·<br>0<br>0      |
| CBP-AgNPs   | 2 mM                       | 11.80 $\pm$ 2.01     | 9.23 $\pm$ 0.60         | 9.30 $\pm$ 0.23   | 8<br>·<br>6<br>0<br>$\pm$<br>0<br>·                                                                                       | 1<br>0<br>·<br>7<br>8<br>$\pm$<br>0<br>·           |

|            |      |              |              |              |              |              |
|------------|------|--------------|--------------|--------------|--------------|--------------|
|            |      |              |              |              | 27           | .23          |
|            | 5 mM | 12.57 ± 0.33 | 9.55 ± 0.06  | 10.19 ± 0.45 | 99.7 ± 0.31  | 11.36        |
| BN extract | -    | 5.50 ± 0.00  | 5.50 ± 0.00  | 5.50 ± 0.00  | 55.0 ± 0.00  | 5.00         |
| BN-AgNPs   | 2 mM | 10.49 ± 0.84 | 9.82 ± 0.31  | 9.36 ± 0.21  | 88.9 ± 0.19  | 10.563       |
|            | 5 mM | 12.77 ± 0.21 | 11.21 ± 0.54 | 10.76 ± 0.57 | 103.3 ± 0.50 | 11.222       |
| LA extract | -    | 5.50 ± 0.00  | 5.50 ± 0.00  | 5.50 ± 0.00  | 55.0 ± 0.00  | 5.00         |
| LA-AgNPs   | 2 mM | 12.07 ± 1.86 | 7.01 ± 1.06  | 9.40 ± 0.23  | 86.8 ± 0.00  | 10.44 ± 0.00 |

|            |      |              |              |              |       |       |
|------------|------|--------------|--------------|--------------|-------|-------|
|            |      |              |              |              | .0    | 1.    |
|            |      |              |              |              | 2.2   | 7     |
|            | 5 mM | 12.47 ± 0.25 | 10.92 ± 0.39 | 10.51 ± 0.69 | 9.1   | 1.1   |
|            |      |              |              |              | .9    | .3    |
|            |      |              |              |              | ± 0.3 | ± 0.3 |
|            |      |              |              |              | .0    | ± 0.0 |
|            |      |              |              |              | .3    | .3    |
|            |      |              |              |              | 2.2   | 3.9   |
| BV extract | -    | 5.50 ± 0.00  | 5.50 ± 0.00  | 5.50 ± 0.00  | 5.5   | 5.5   |
|            |      |              |              |              | 0.0   | ± 0.0 |
|            |      |              |              |              | ± 0.0 | ± 0.0 |
|            |      |              |              |              | .0    | .0    |
|            |      |              |              |              | 0.0   | 0.0   |
| BV-AgNPs   | 2 mM | 10.74 ± 0.07 | 10.61 ± 0.16 | 9.63 ± 0.24  | 9.1   | 1.0   |
|            |      |              |              |              | .4    | .5    |
|            |      |              |              |              | ± 0.4 | ± 0.4 |
|            |      |              |              |              | .0    | ± 0.0 |
|            |      |              |              |              | .2    | .2    |
|            |      |              |              |              | 2.2   | 0.0   |
| BV-AgNPs   | 5 mM | 12.68 ± 0.32 | 11.15 ± 0.19 | 10.56 ± 0.18 | 1.1   | 1.1   |
|            |      |              |              |              | .0    | .3    |
|            |      |              |              |              | .0    | ± 0.0 |
|            |      |              |              |              | .3    | ± 0.0 |
|            |      |              |              |              | ± 0.0 | ± 0.0 |
|            |      |              |              |              | .7    | .5    |
|            |      |              |              |              | 2.2   | 1.1   |
| OV extract | -    | -            | -            | -            | -     | -     |
| OV-AgNPs   | 2 mM | 5.50 ± 0.00  | 7.18 ± 0.14  | 5.50 ± 0.00  | 5.5   | 5.5   |
|            |      |              |              |              | .0    | ± 0.0 |
|            |      |              |              |              | ± 0.0 | ± 0.0 |
|            |      |              |              |              | .0    | .0    |
|            |      |              |              |              | 0.0   | 0.0   |
| OV-AgNPs   | 5 mM | 10.17 ± 0.33 | 9.47 ± 0.34  | 9.31 ± 0.47  | 8.9   | 9.7   |
|            |      |              |              |              | .5    | .7    |

|                        |      |              |              |              |                                           |                                                |
|------------------------|------|--------------|--------------|--------------|-------------------------------------------|------------------------------------------------|
|                        |      |              |              |              | 4<br>±<br>0<br>·<br>2<br>9                | 7<br>±<br>0<br>·<br>3<br>8                     |
| gentamicin<br>sulphate |      | 10.28 ± 0.39 | 12.27 ± 0.35 | 10.84 ± 0.37 | 1<br>0<br>·<br>7<br>±<br>0<br>·<br>2<br>4 | 1<br>1<br>·<br>2<br>6<br>±<br>0<br>·<br>0<br>8 |
|                        |      | 12.25 ± 2.49 | 12.64 ± 0.63 | 10.13 ± 0.17 | 9<br>·<br>9<br>0<br>±<br>0<br>·<br>2<br>0 | 1<br>0<br>·<br>8<br>9<br>±<br>0<br>·<br>0      |
|                        |      | 12.44 ± 2.67 | 12.34 ± 0.62 | 10.21 ± 0.32 | 9<br>·<br>3<br>6<br>±<br>0<br>·<br>1<br>1 | 1<br>1<br>·<br>0<br>2<br>±<br>0<br>·<br>5<br>6 |
| AgNO <sub>3</sub>      | 5 mM | 13.02 ± 0.71 | 11.94 ± 0.97 | 10.13 ± 0.37 | 1<br>0<br>·<br>7<br>±<br>0<br>·<br>2<br>5 | 1<br>1<br>·<br>8<br>5<br>±<br>0<br>·<br>2<br>2 |
| AgNO <sub>3</sub>      | 2 mM | 12.04 ± 1.31 | 10.30 ± 0.45 | 9.63 ± 0.29  | 9<br>·<br>2<br>9<br>±<br>0<br>·<br>2<br>4 | 1<br>0<br>·<br>3<br>9<br>±<br>0<br>·<br>3<br>1 |

CBP - *Capsella bursa-pastoris*, BN - *Brassica nigra*, LA - *Lavandula angustifolia*, BV - *Berberis vulgaris* OV - *Origanum vulgare*
